# Supplementary material for: Radiomics Analysis in Characterization of Salivary Gland Tumors on MRI: A Systematic Review
Source: MDPI journal article supplement (doi:10.3390/cancers15204918), 2023-10-10
Supplement: s1 [file s1]

# Supplementary Materials: Radiomics Analysis in Characterization of Salivary Gland Tumors on MRI: A Systematic Review

Kaijing Mao, Lun M. Wong, Rongli Zhang, Tiffany Y. So, Zhiyi Shan, Kuofeng Hung and Qiyong H. Ai

**Table S1.** Details of radiomics protocols used in each included study.

| Study ID | Image acquisition and segmentation |                 |                  |                      | Feature extraction and selection           |                                | Model            |                       |
|----------|------------------------------------|-----------------|------------------|----------------------|--------------------------------------------|--------------------------------|------------------|-----------------------|
|          | Investigated sequence(s)           | ROI/VOI         | Segmentation     | Intra-observer (ICC) | Features selection method                  | Feature Validation             | Classifier       | Classifier Validation |
| 1        | DWI                                | Whole tumor     | manual           | > 0.75               | PCC value, RFE algorithm                   | 5-fold cross-validation        | LDA              | internal validation   |
| 2        | T2WI                               | Whole tumor     | manual           | NA                   | Wilcoxon rank-sum test, PCC value          | NA                             | SVM              | NA                    |
| 3        | T1WI, fs-T2WI                      | Whole tumor     | Manual           | > 0.75               | LASSO, ANOVA                               | 10-fold cross-validation       | LR               | external validation   |
| 4        | T1WI, T2WI CE-T1WI                 | Two slices      | Manual/automatic | NA                   | An operator-independent statistical system | NA                             | LR               | cross-validation      |
| 5        | DWI                                | VOI whole tumor | Manual           | >0.75                | LASSO, ANOVA                               | 5-fold cross-validation        | LR, SVM, KNN     | cross-validation      |
| 6        | T1WI, T2WI CE-T1WI                 | Whole tumor     | Manual           | >0.75                | LASSO, The Select K Best                   | 10-fold cross-validation       | XGBoost, SVM, DT | internal validation   |
| 7        | T1WI, T2WI                         | Whole tumor     | Semiautomatic    | NA                   | PCC                                        | Bootstrap                      | NA               | internal validation   |
| 8        | T1WI, fs-T2WI                      | Whole tumor     | Manual           | >0.75                | LASSO, ANOVA                               | 10-fold cross-validation       | NA               | external validation   |
| 9        | T1WI; CE-T1WI T2WI, DWI, DCE       | Whole tumor     | Manual           | NA                   | AIC, BIC                                   | Leave-one-out cross-validation | LDA, SVM         | Cross-validation      |
| 10       | T1WI T2WI                          | NA              | Manual           | >0.75                | LASSO, t-test, Mann–Whitney U test         | 10-fold cross-validation       | LR, SVM          | internal validation   |
| 11       | T1WI, fs-T2WI CE-T1WI              | NA              | Manual           | NA                   | LASSO, t-test, Wilcoxon rank-sum test      | 10-fold cross-validation       | LR               | cross-validation      |
| 12       | T1WI, T2WI                         | NA              | Automatic        | NA                   | LASSO                                      | 10-fold cross-validation       | NA               | NA                    |
| 13       | T2WI                               | Whole tumor     | Manual           | >0.75                | LASSO, t-test                              | 5-fold cross-validation        | LR               | internal validation   |
| 14       | T2WI                               | Whole tumor     | Manual           | NA                   | Kruskal–Wallis test                        | NA                             | LR, SVM, NNET DT | internal validation   |

AIC: Akaike Information Criterion, ANOVA: One-way analysis of variance, BIC: Schwarz Bayesian Information Criterion, CE: contrast enhanced, DCE: dynamic contrast enhanced, DT: Decision tree, DWI: diffusion-weighted imaging, FS: fat saturation, ICC: intra-class correlation coefficient, KNN: K-nearest neighbor, LASSO: least absolute shrinkage and selection operator, LDA: linear discriminant analysis, LR: logistic regression, NA: not available, NNET: artificial neural network, PCC: Pearson correlation coefficient, RFE: recursive feature elimination, ROI/VOI: region/volume of interest, SVM: support vector machine, T1WI: T1 weighted image, T2WI: T2 weighted image, XGBoost: Extreme gradient boosting.

Table S2. QUADAS-2 assessment for each study.

| Study    | RISK OF BIAS      |            |                    |                 | APPLICABILITY CONCERNS |            |                    |
|----------|-------------------|------------|--------------------|-----------------|------------------------|------------|--------------------|
|          | PATIENT SELECTION | INDEX TEST | REFERENCE STANDARD | FLOW AND TIMING | PATIENT SELECTION      | INDEX TEST | REFERENCE STANDARD |
| Study 1  |                   |            |                    |                 |                        |            |                    |
| Study 2  |                   |            |                    |                 |                        |            |                    |
| Study 3  |                   |            |                    |                 |                        |            |                    |
| Study 4  |                   |            |                    |                 |                        |            |                    |
| Study 5  |                   |            |                    |                 |                        |            |                    |
| Study 6  |                   |            |                    |                 |                        |            |                    |
| Study 7  |                   |            |                    |                 |                        |            |                    |
| Study 8  |                   |            |                    |                 |                        |            |                    |
| Study 9  |                   |            |                    |                 |                        |            |                    |
| Study 10 |                   |            |                    |                 |                        |            |                    |
| Study 11 |                   |            |                    |                 |                        |            |                    |
| Study 12 |                   |            |                    |                 |                        |            |                    |
| Study 13 |                   |            |                    |                 |                        |            |                    |
| Study 14 |                   |            |                    |                 |                        |            |                    |

Low Risk   
 High Risk   
 Unclear Risk; QUADAS-2: Quality Assessment of Diagnostic Accuracy Studies-2.

Table S3. Individual and summarized RQS scores for each study.

| Study ID | Image protocol | Multiple segmentations | Phantom study on all scanners | Multiple time points | Feature reduction | Non-radiomics features | Biological correlates | Cut-off | Discrimination | Calibration | Prospective study | Validation | Comparison to gold standard | Potential clinical utility | Cost-effectiveness analysis | Open science | Total |
|----------|----------------|------------------------|-------------------------------|----------------------|-------------------|------------------------|-----------------------|---------|----------------|-------------|-------------------|------------|-----------------------------|----------------------------|-----------------------------|--------------|-------|
| 1        | 1              | 1                      | 0                             | 0                    | 3                 | 0                      | 0                     | 0       | 2              | 0           | 0                 | 2          | 2                           | 0                          | 0                           | 0            | 11    |
| 2        | 1              | 0                      | 0                             | 0                    | 3                 | 0                      | 1                     | 0       | 1              | 0           | 0                 | 2          | 2                           | 2                          | 0                           | 0            | 12    |
| 3        | 1              | 1                      | 0                             | 0                    | 3                 | 1                      | 0                     | 0       | 1              | 1           | 0                 | 3          | 2                           | 2                          | 0                           | 0            | 15    |
| 4        | 1              | 0                      | 0                             | 0                    | 3                 | 0                      | 1                     | 0       | 1              | 0           | 0                 | 2          | 2                           | 2                          | 0                           | 0            | 12    |
| 5        | 1              | 1                      | 0                             | 0                    | 3                 | 0                      | 1                     | 0       | 2              | 0           | 0                 | 2          | 2                           | 0                          | 0                           | 0            | 12    |
| 6        | 1              | 1                      | 0                             | 0                    | 3                 | 0                      | 0                     | 0       | 2              | 0           | 0                 | 2          | 2                           | 2                          | 0                           | 0            | 13    |
| 7        | 1              | 0                      | 0                             | 0                    | 3                 | 1                      | 1                     | 0       | 1              | 1           | 0                 | 2          | 2                           | 2                          | 0                           | 0            | 14    |
| 8        | 1              | 1                      | 0                             | 0                    | 3                 | 1                      | 1                     | 0       | 1              | 1           | 0                 | 3          | 2                           | 2                          | 0                           | 0            | 16    |
| 9        | 1              | 0                      | 0                             | 0                    | 3                 | 1                      | 0                     | 0       | 2              | 0           | 0                 | 2          | 2                           | 0                          | 0                           | 0            | 11    |
| 10       | 1              | 1                      | 0                             | 0                    | 3                 | 0                      | 0                     | 0       | 1              | 1           | 0                 | 2          | 2                           | 2                          | 0                           | 0            | 13    |
| 11       | 1              | 0                      | 0                             | 0                    | 3                 | 0                      | 0                     | 0       | 2              | 0           | 0                 | 2          | 2                           | 0                          | 0                           | 0            | 11    |
| 12       | 1              | 0                      | 0                             | 0                    | 3                 | 1                      | 1                     | 0       | 1              | 1           | 0                 | 2          | 2                           | 2                          | 0                           | 0            | 14    |
| 13       | 1              | 1                      | 0                             | 0                    | 3                 | 1                      | 0                     | 0       | 1              | 1           | 0                 | 2          | 2                           | 2                          | 0                           | 0            | 14    |
| 14       | 1              | 1                      | 0                             | 0                    | 3                 | 1                      | 1                     | 0       | 1              | 0           | 0                 | 2          | 2                           | 0                          | 0                           | 0            | 12    |

RQS: radiomics quality score.
